# Supplementary material for: Immune Determinants of Viral Clearance in Hospitalised COVID-19 Patients: Reduced Circulating Naïve CD4+ T Cell Counts Correspond with Delayed Viral Clearance
Source: MDPI journal article supplement (doi:10.3390/cells11172743), 2022-09-02

**Supplementary Figure S1.** Kinetics of SARS-CoV-2 specific (neutralizing) antibody responses in hospitalized patients in relation to the time post onset of symptoms, per patient, with anti-HCOV-229E IgG as control. Blue: viral clearance  $\leq 21$  days, red  $> 21$  days. C-term./C-t.; C-terminal, N-term/N-t.; N-terminal.

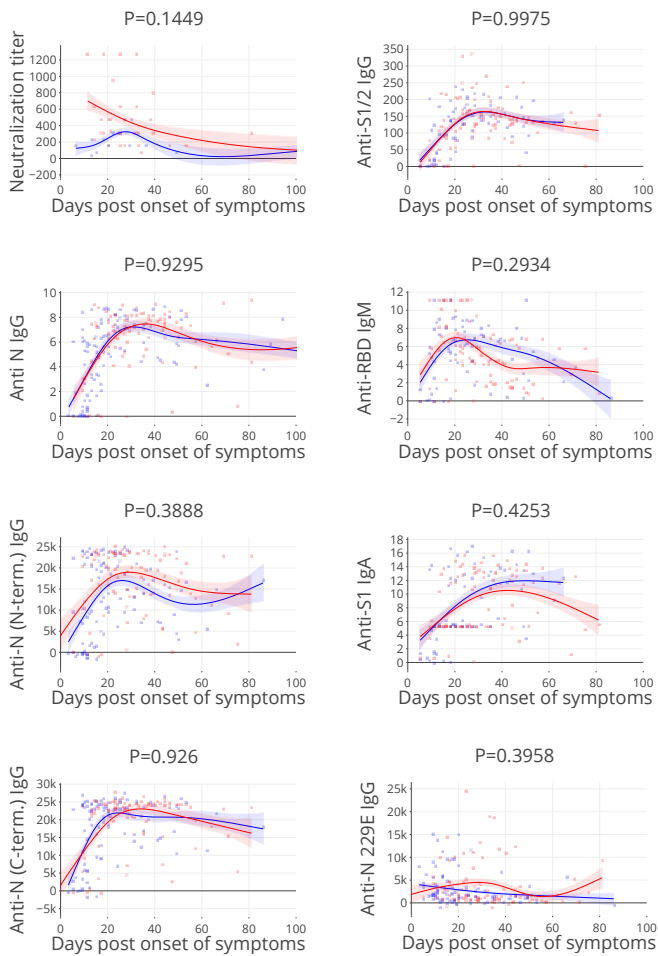

**Supplementary Figure S2.** Kinetics of absolute counts of circulating leukocyte subsets (measured as cells/  $\mu$ L) in relation to the time post onset of symptoms, per patient. Blue: viral clearance  $\leq$  21 days, red:  $>$  21 days. Analyses of max. values did not result in significant differences between the two groups of viral clearance, ICU and fatality.

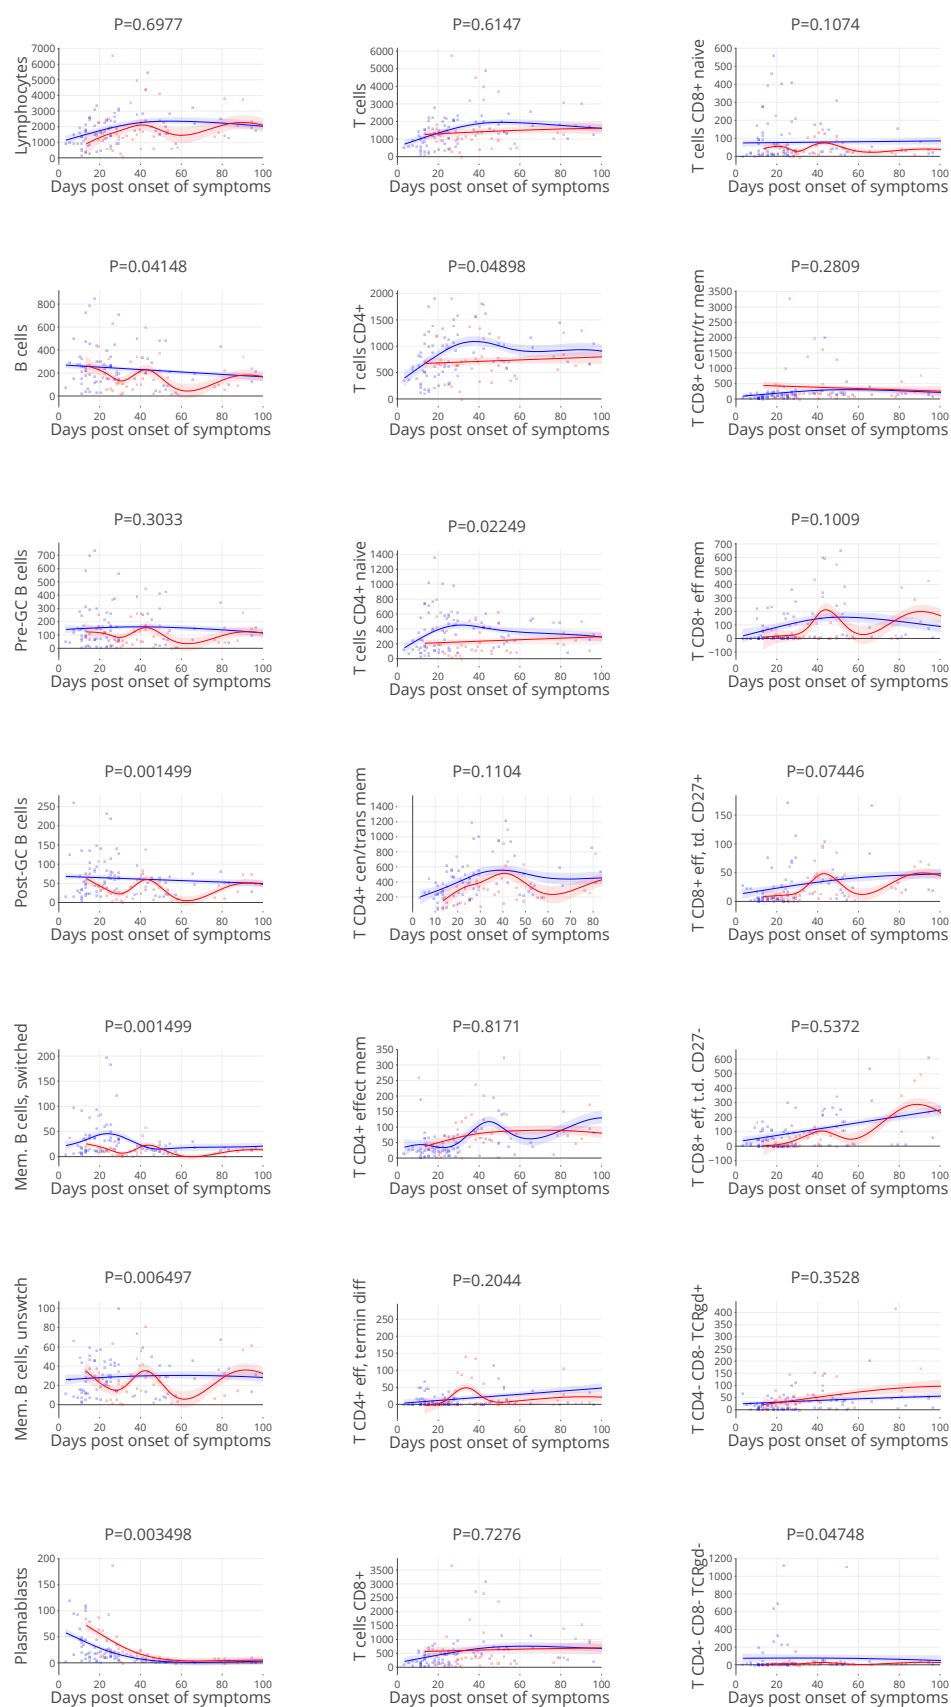

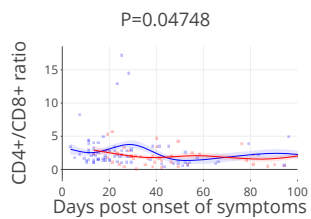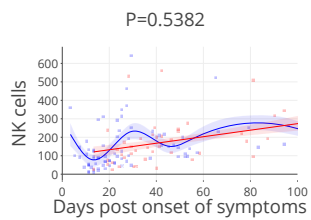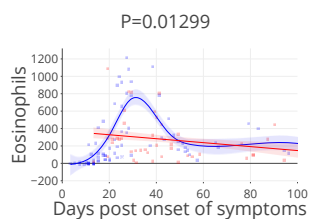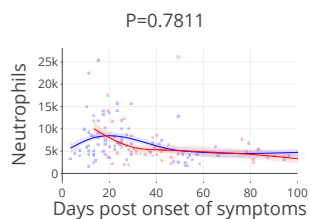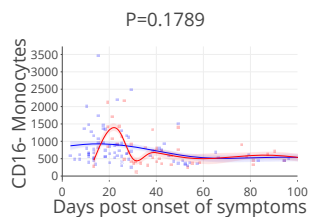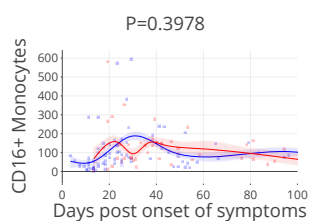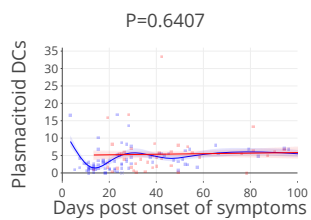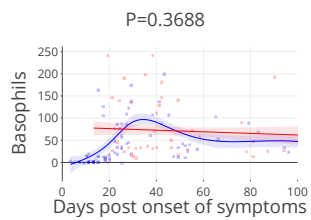

**Supplementary Figure S3.** Correlation heatmaps of the max. level of immune parameters in individual patients **a**, and per group: **b**, viral clearance  $\leq 21$  days and **c**, viral clearance  $> 21$  days.

**a**

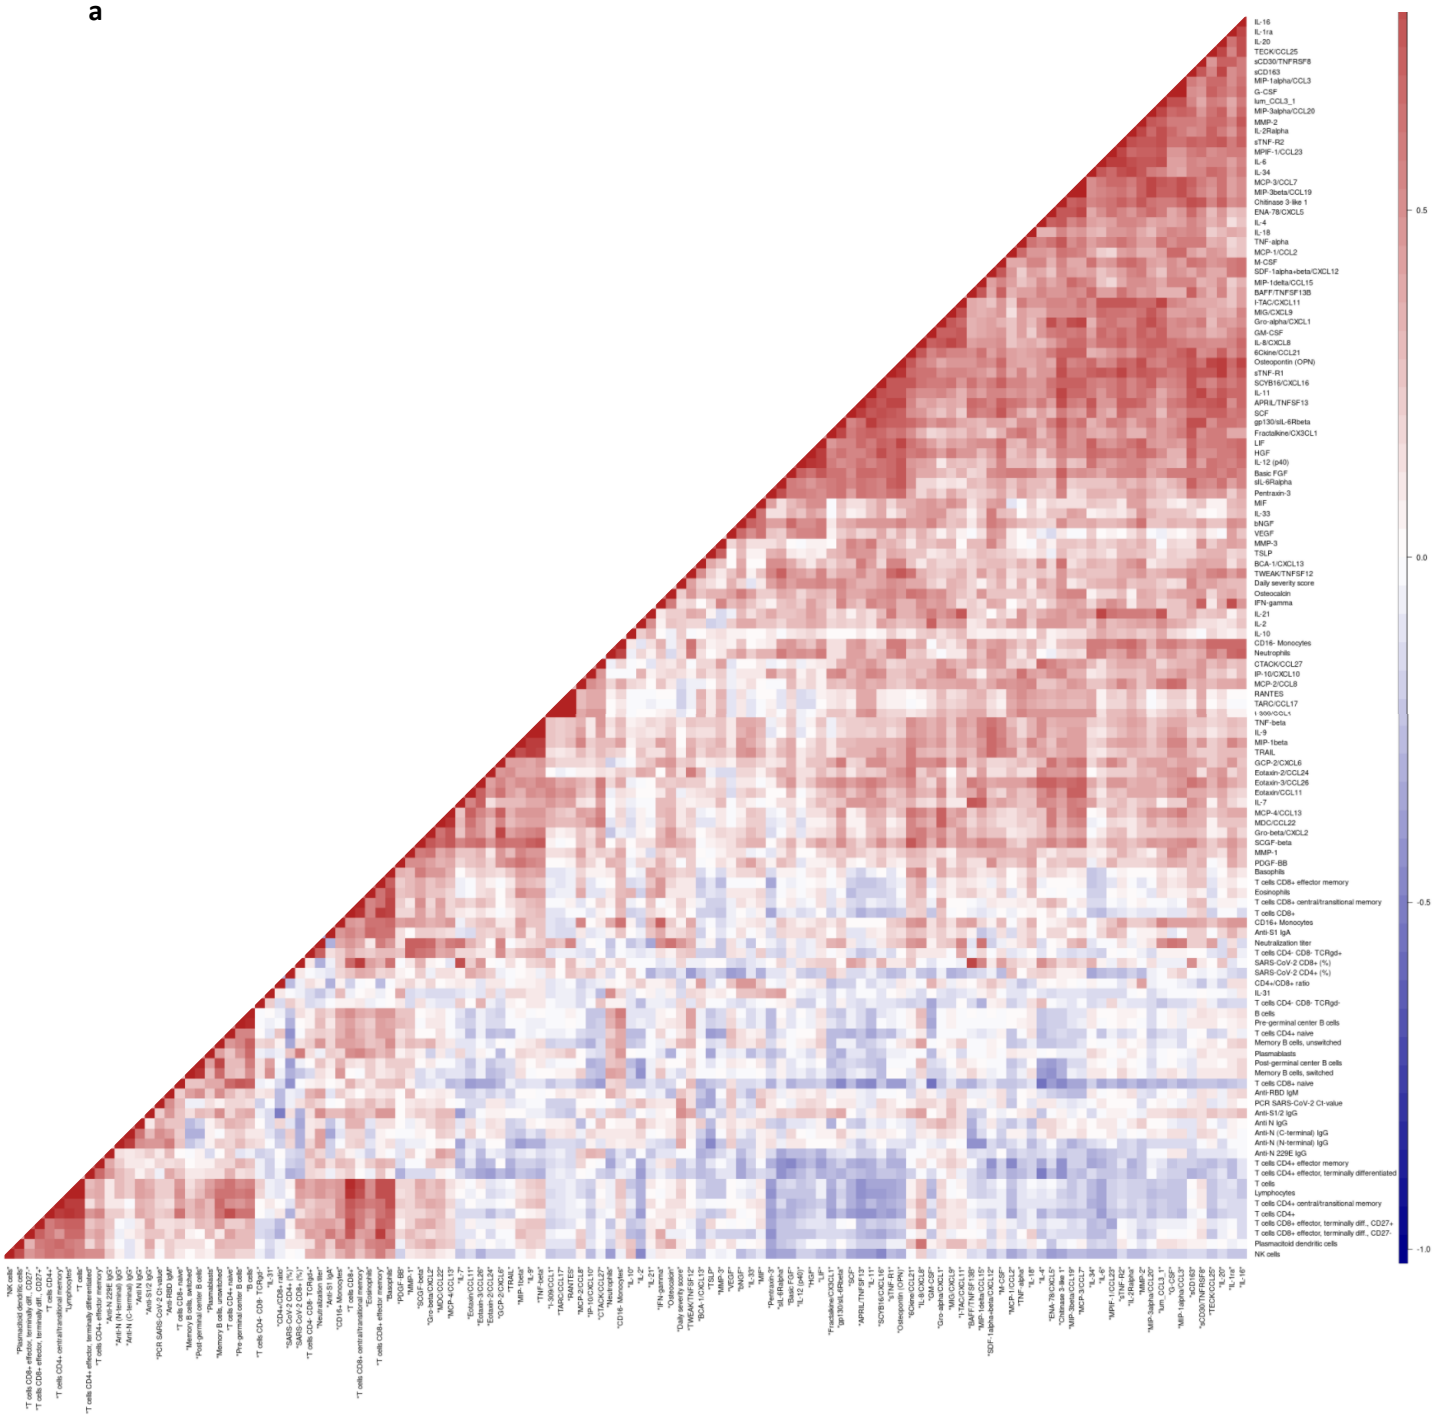



**Supplementary Figure S4. Leukocyte subtypes identified by flow cytometry and their expression profiles reflecting the gating strategy used.** A: APS (Automatic Population Separator) plots that use the information from all the parameters included in the file; B: Bi-parameter plots reflecting the expression profile for each of the markers used (Far-left: major leukocyte subsets, middle-left: major lymphocyte subsets, middle right: main T cell subsets; far-right: main B cell subsets; DCs = dendritic cells, EM = effector memory cells, Eff = terminally differentiated effector cells, NK = natural killer, TM = transitional memory cells.

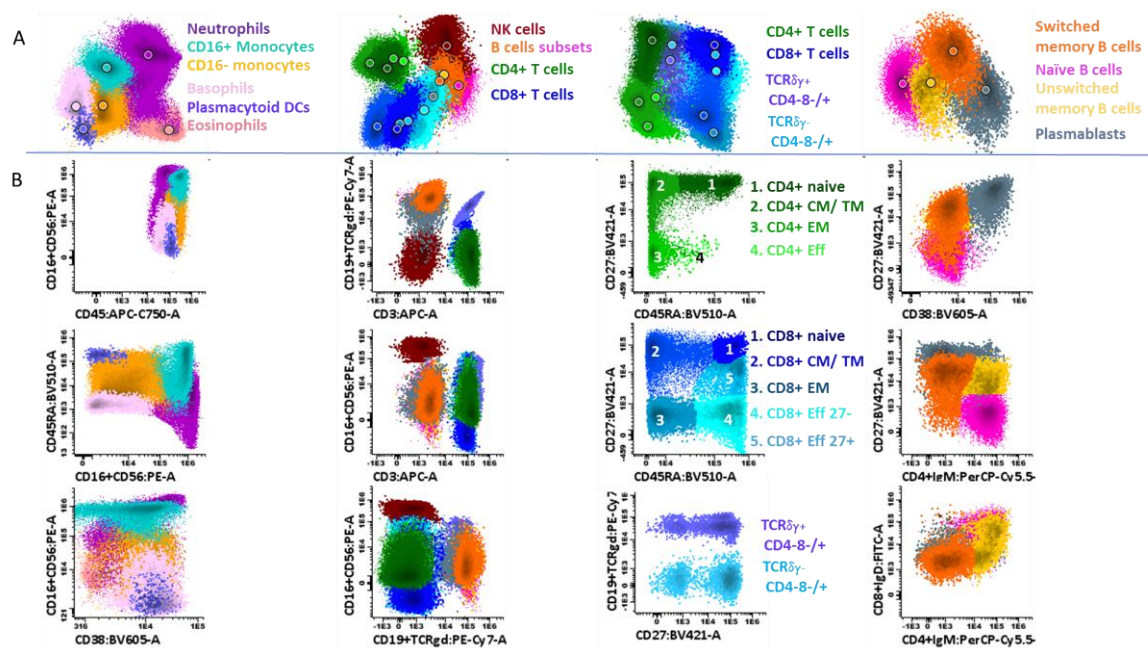

Supplement: s1 [file s1]
